# Supplementary material for: The chicken gut metagenome and the modulatory effects of plant-derived benzylisoquinoline alkaloids
Source: PubMed Central journal article supplement (PMC6260706; doi:10.1186/s40168-018-0590-5), 2018-11-27

Foregut Hindgut

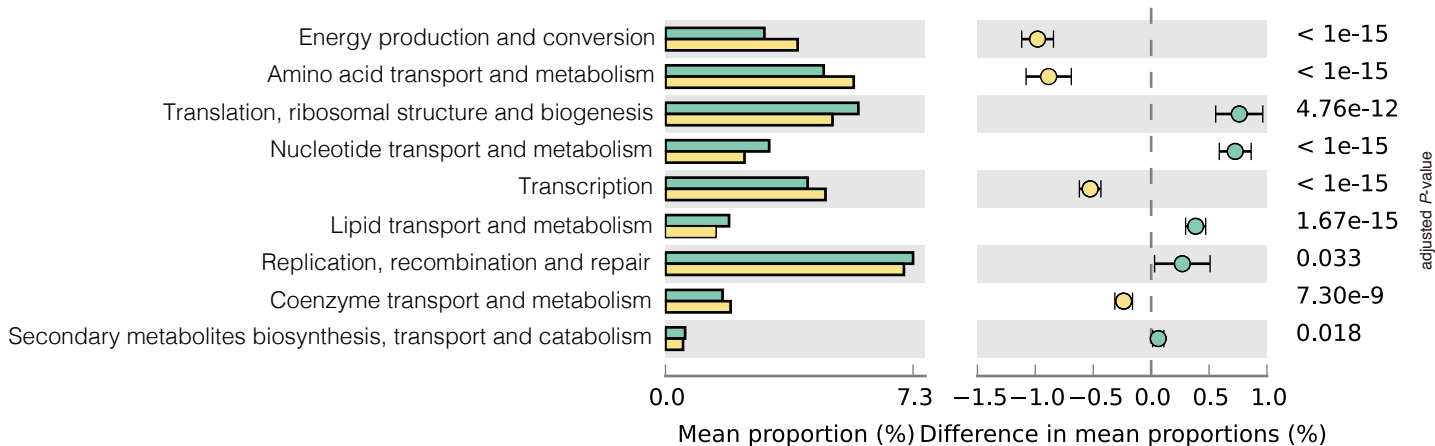

Supplement: 40168_2018_590_MOESM14_ESM.pdf [file 40168_2018_590_MOESM14_ESM.pdf]
