# Supplementary material for: The chicken gut metagenome and the modulatory effects of plant-derived benzylisoquinoline alkaloids
Source: Microbiome. 2018 Nov 27;6:211. doi: 10.1186/s40168-018-0590-5 (PMC6260706; doi:10.1186/s40168-018-0590-5)
Supplement: Supplementary file 19 — Table S6. The relative abundances of major genera at different ages (average relative abundance > 0.01%). (XLSX 44 kb) [file 40168_2018_590_MOESM19_ESM.xlsx]

## Sheet: 工作表1
Additional file 19: Table S6. The relative abundances of major genera at different ages (average relative abundance > 0.01 %).
Genus	Foregut
	D01		D07		D14		D28		D42
	Meana %	SDb %	Meana %	SDb %	Meana %	SDb %	Meana %	SDb %	Meana %	SDb %
Lactobacillus	2.06	1.18	13.94	14.37	25.08	17.49	43.21	16	32.76	12.3
Enterococcus	11.76	17.31	5.14	8.25	0.36	0.37	0.33	0.31	2.75	5.07
Streptococcus	0.26	0.37	0.29	0.36	0.23	0.21	1.1	1.96	0.97	1.32
Corynebacterium	0.07	0.05	0.34	0.52	0.19	0.2	0.17	0.14	0.81	1.59
Bifidobacterium	0.08	0.07	0.54	1.91	1.29	2.53	0.46	0.52	0.57	0.75
Stenotrophomonas	0.04	0.05	0.85	1.24	0.09	0.21	0.64	1.55	0.53	1.14
Alistipes	0.18	0.19	0.08	0.07	0.79	1.39	0.34	0.53	0.49	0.76
Kitasatospora	0.02	0.03	0.2	0.48	0.06	0.08	0.33	1.14	0.48	1.71
Pseudomonas	0.1	0.12	0.3	0.71	0.4	0.77	0.57	0.79	0.39	0.56
Subdoligranulum	0.24	0.2	1.28	2	2.89	3.1	1.29	2.6	0.34	0.42
Streptomyces	0.18	0.1	0.27	0.33	0.11	0.13	0.26	0.74	0.31	1.11
Clostridium	0.25	0.28	0.91	1.19	0.63	0.52	0.4	0.49	0.3	0.55
Weissella	1.61	2.21	0.05	0.07	0.04	0.08	0.05	0.04	0.29	0.48
Escherichia	5.54	8.29	1.8	4.35	0.4	0.76	0.18	0.38	0.25	0.64
Butyricicoccus	0.18	0.19	1.15	1.03	1.32	1.8	0.29	0.46	0.22	0.41
Faecalibacterium	0.09	0.11	0.17	0.37	0.42	1.03	0.16	0.12	0.21	0.47
Microbacterium	0.12	0.16	0.14	0.19	0.1	0.1	0.23	0.22	0.16	0.15
Blautia	0.1	0.12	0.35	0.31	0.39	0.27	0.18	0.17	0.13	0.11
Bacteroides	0.15	0.18	0.32	0.44	0.7	1.09	0.18	0.4	0.12	0.13
Methylobacterium	0.05	0.06	0.51	1.66	0.58	1.38	0.27	0.75	0.1	0.26
Eubacterium	0.07	0.08	0.31	0.26	0.41	0.36	0.16	0.18	0.08	0.1
Klebsiella	0.12	0.08	0.45	1.44	0.01	0.01	0.02	0.06	0.07	0.31
Oscillibacter	0.06	0.07	0.26	0.55	0.09	0.07	0.1	0.14	0.07	0.1
Delftia	0.06	0.05	0.1	0.11	0.03	0.04	0.07	0.19	0.05	0.09
Brachybacterium	0.1	0.07	0.15	0.22	0.14	0.18	0.22	0.48	0.05	0.09
Ruminococcus	0.04	0.04	0.16	0.11	0.17	0.21	0.08	0.08	0.05	0.07
Ochrobactrum	<0.001	<0.001	0.02	0.02	0.02	0.02	0.13	0.22	0.05	0.06
Bilophila	0.02	0.02	0.02	0.05	0.01	0.04	0.07	0.1	0.04	0.05
Acinetobacter	0.13	0.29	0.08	0.18	0.03	0.06	0.08	0.15	0.03	0.05
Pseudoflavonifractor	0.04	0.04	0.11	0.11	0.16	0.13	0.05	0.06	0.03	0.05
Sphingomonas	0.01	0.01	0.11	0.21	0.05	0.09	0.03	0.04	0.03	0.02
Staphylococcus	0.03	0.04	0.02	0.02	0.02	0.02	0.02	0.01	0.03	0.02
Gordonibacter	<0.001	<0.001	0.03	0.04	0.07	0.1	0.02	0.03	0.02	0.04
Anaerotruncus	0.03	0.03	0.09	0.1	0.1	0.14	0.02	0.02	0.02	0.04
Dorea	0.01	0.02	0.07	0.06	0.06	0.05	0.03	0.03	0.02	0.03
Eggerthella	0.01	0.01	0.05	0.06	0.09	0.11	0.04	0.06	0.02	0.02
Phascolarctobacterium	0.04	0.06	<0.001	0.01	0.01	0.01	0.01	0.02	0.02	0.02
Akkermansia	0.01	0.02	<0.001	<0.001	<0.001	<0.001	<0.001	0.01	0.01	0.04
Shigella	0.21	0.33	0.06	0.15	0.01	0.03	0.01	0.01	0.01	0.02
Flavonifractor	0.02	0.02	0.07	0.06	0.03	0.03	0.01	0.03	0.01	0.02
Collinsella	0.02	0.02	0.01	0.02	0.01	0.01	0.01	0.02	0.01	0.02
Brevibacterium	0.06	0.06	0.09	0.14	0.06	0.08	0.14	0.33	0.01	0.01
Campylobacter	0.01	<0.001	<0.001	<0.001	0.01	0.01	0.04	0.15	0.01	0.01
Megamonas	0.02	0.03	<0.001	<0.001	0.04	0.06	0.01	0.01	0.01	0.01
Barnesiella	0.01	0.01	<0.001	0.01	<0.001	<0.001	0.01	0.01	<0.001	0.01
Deinococcus	<0.001	<0.001	0.12	0.25	<0.001	<0.001	<0.001	<0.001	<0.001	<0.001
Chlamydia	0.22	0.19	0.07	0.11	0.06	0.12	0.01	0.03	<0.001	<0.001
Citrobacter	0.06	0.09	0.01	0.03	<0.001	<0.001	<0.001	<0.001	<0.001	<0.001
Odoribacter	0.01	0.01	<0.001	<0.001	<0.001	<0.001	<0.001	<0.001	<0.001	<0.001
Genus	Hindgut
	D01		D07		D14		D28		D42
	Meana %	SDb %	Meana %	SDb %	Meana %	SDb %	Meana %	SDb %	Meana %	SDb %
Lactobacillus	1.19	1.35	2.63	4.97	5.93	12.12	3.98	7.23	1.43	1.96
Enterococcus	38.94	17.07	2.25	7.58	0.43	1.03	0.17	0.32	0.16	0.22
Streptococcus	0.17	0.05	0.09	0.17	0.06	0.07	0.53	1.52	0.15	0.28
Corynebacterium	0.03	0.01	0.03	0.08	0.02	0.03	0.02	0.01	0.02	0.01
Bifidobacterium	0.04	0.03	0.15	0.33	2.18	4.59	3.91	6.85	0.56	1.28
Stenotrophomonas	0.01	0.02	0.02	0.02	0.01	0.02	<0.001	<0.001	<0.001	<0.001
Alistipes	0.11	0.12	0.14	0.15	3.25	3.92	2.19	1.98	5.28	3.65
Kitasatospora	<0.001	<0.001	0.01	0.01	<0.001	<0.001	<0.001	<0.001	<0.001	<0.001
Pseudomonas	0.03	0.02	0.02	0.01	0.01	0.01	0.02	0.03	0.01	0.01
Subdoligranulum	0.13	0.12	3.52	4.15	6.25	5.61	4.15	2.96	2.11	1.31
Streptomyces	0.04	0.04	0.04	0.1	0.01	0.01	0.01	<0.001	0.01	<0.001
Clostridium	0.51	0.38	2.33	1.41	1.41	0.54	1.59	0.59	1.59	0.31
Weissella	0.11	0.18	0.01	0.01	<0.001	<0.001	<0.001	0.01	0.01	0.02
Escherichia	6.71	2.75	0.63	1.07	0.53	1.09	0.65	1.72	0.16	0.25
Butyricicoccus	0.47	0.73	3.7	2.56	2.4	2.03	1.38	0.8	1.28	0.58
Faecalibacterium	0.04	0.01	0.31	0.49	0.36	0.26	1.91	1.61	1.96	0.81
Microbacterium	0.01	0.01	0.02	0.04	0.01	0.01	0.01	0.02	0.01	0.01
Blautia	0.26	0.36	0.71	0.41	1.06	0.81	0.76	0.41	0.94	0.74
Bacteroides	0.63	0.8	0.8	0.69	1.28	1.52	1.3	1.17	1.5	0.94
Methylobacterium	0.03	0.03	0.01	0.01	0.01	0.01	<0.001	<0.001	<0.001	<0.001
Eubacterium	0.09	0.12	0.8	0.5	1	0.59	0.8	0.31	0.65	0.18
Klebsiella	4.85	6.35	0.32	0.92	0.01	0.02	0.01	0.02	<0.001	<0.001
Oscillibacter	0.02	0.01	0.54	0.45	0.25	0.23	0.43	0.33	0.53	0.15
Delftia	0.03	0.03	0.01	0.02	<0.001	0.01	<0.001	<0.001	<0.001	<0.001
Brachybacterium	0.02	0.01	0.02	0.05	0.01	<0.001	0.01	<0.001	0.01	0.01
Ruminococcus	0.07	0.11	0.46	0.36	0.35	0.17	0.4	0.29	0.35	0.09
Ochrobactrum	<0.001	<0.001	<0.001	<0.001	<0.001	<0.001	0.01	0.02	<0.001	<0.001
Bilophila	0.01	0.01	0.03	0.07	0.01	<0.001	0.93	0.73	0.55	0.33
Acinetobacter	0.02	0.01	<0.001	<0.001	<0.001	<0.001	0.01	0.01	<0.001	<0.001
Pseudoflavonifractor	0.03	0.02	0.38	0.22	0.34	0.13	0.27	0.1	0.29	0.09
Sphingomonas	0.01	0.01	<0.001	0.01	<0.001	<0.001	<0.001	0.01	<0.001	<0.001
Staphylococcus	0.17	0.11	0.01	0.03	0.01	0.02	<0.001	<0.001	<0.001	<0.001
Gordonibacter	0.01	0.01	0.08	0.13	0.32	0.42	0.1	0.09	0.11	0.09
Anaerotruncus	0.01	0.01	0.41	0.32	0.18	0.15	0.18	0.18	0.14	0.1
Dorea	0.03	0.03	0.16	0.09	0.13	0.06	0.12	0.05	0.16	0.04
Eggerthella	0.04	0.07	0.11	0.09	0.3	0.25	0.12	0.12	0.09	0.05
Phascolarctobacterium	0.01	0.01	0.01	0.01	0.01	<0.001	0.27	0.24	0.47	0.47
Akkermansia	0.01	0.01	<0.001	<0.001	0.03	0.12	0.1	0.24	0.16	0.54
Shigella	0.24	0.12	0.02	0.04	0.02	0.03	0.02	0.05	0.01	0.01
Flavonifractor	0.06	0.1	0.17	0.23	0.1	0.23	0.03	0.01	0.03	0.01
Collinsella	0.01	0.01	<0.001	<0.001	0.01	<0.001	0.03	0.05	0.11	0.22
Brevibacterium	0.01	0.01	0.01	0.03	<0.001	<0.001	<0.001	<0.001	<0.001	<0.001
Campylobacter	<0.001	<0.001	0.01	<0.001	0.06	0.24	0.12	0.35	0.01	0.01
Megamonas	0.01	0.01	0.01	0.01	0.07	0.2	0.42	0.77	0.29	0.47
Barnesiella	<0.001	<0.001	0.01	0.03	0.01	0.01	0.15	0.3	0.06	0.09
Deinococcus	<0.001	0.01	<0.001	0.01	<0.001	<0.001	<0.001	<0.001	<0.001	<0.001
Chlamydia	0.05	0.06	0.02	0.06	<0.001	0.01	<0.001	<0.001	<0.001	<0.001
Citrobacter	0.47	0.52	<0.001	<0.001	<0.001	0.01	<0.001	0.01	<0.001	<0.001
Odoribacter	<0.001	<0.001	<0.001	<0.001	<0.001	<0.001	0.03	0.04	0.11	0.13
a. Mean, average relative abundance.
b. SD, standard deviation.
